# Supplementary material
Source: PubMed Central journal article supplement (PMC3424405)
Supplement: NIHMS391902-supplement-1.pdf [file NIHMS391902-supplement-1.pdf]

A

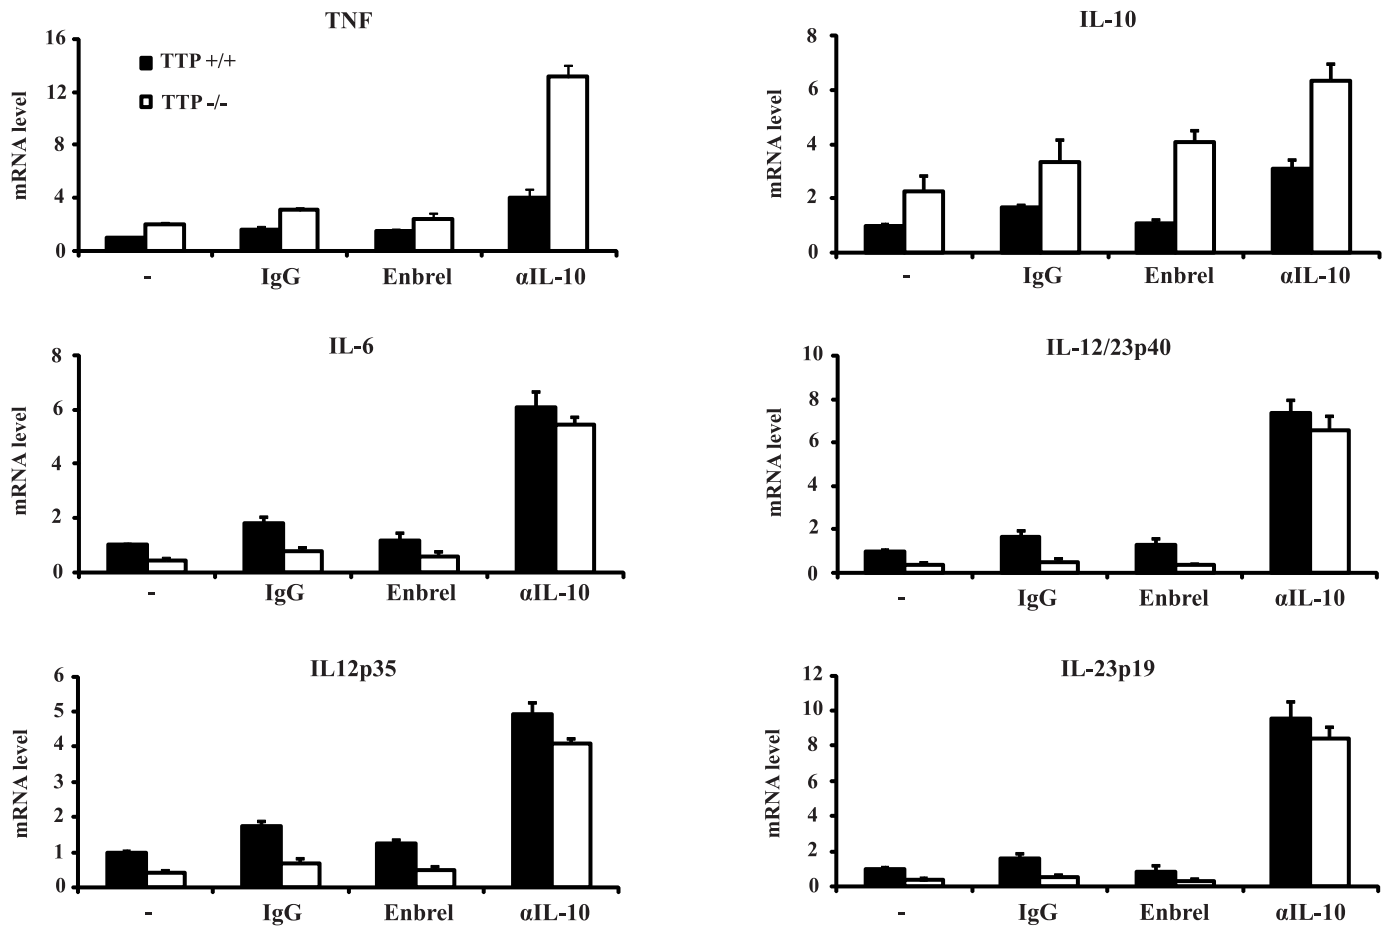

B

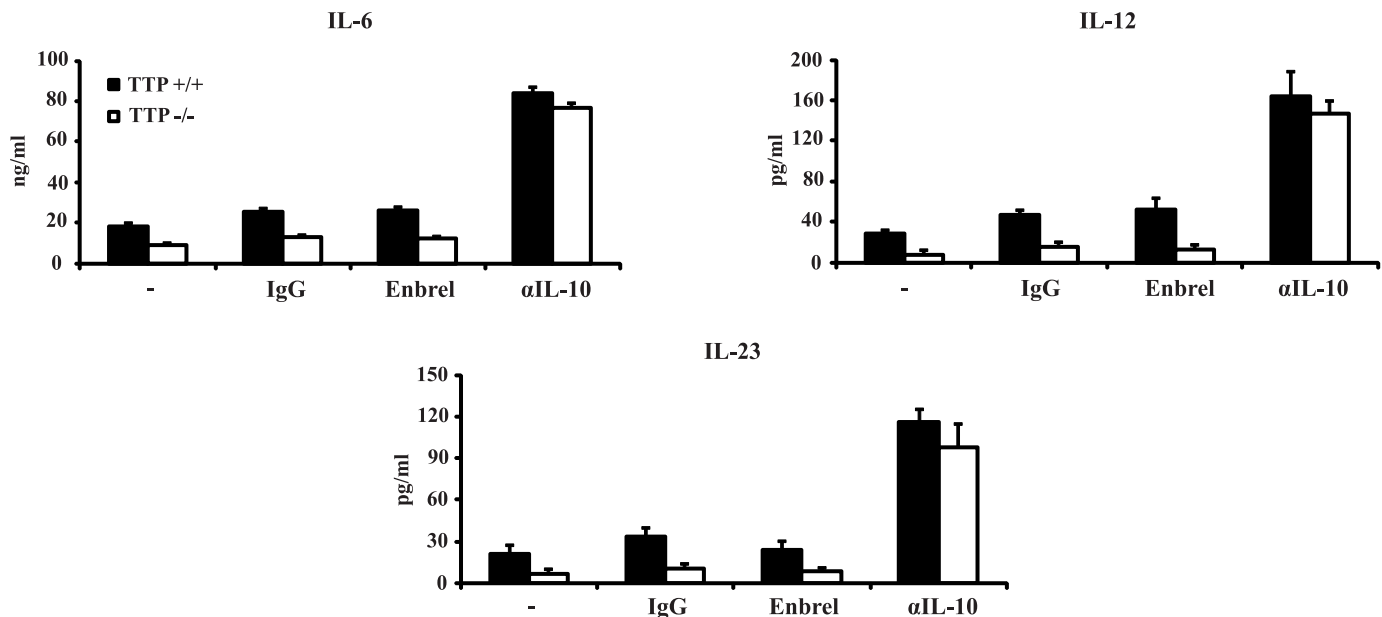**SUPPLEMENTARY FIGURE 1.**

Autocrine IL-10 is required for TTP-mediated control of IL-6, IL-12, and IL-23 expression. *A*, Effects of IL-10 neutralization on cytokine mRNA expression in LPS-stimulated *Ttp*<sup>+/+</sup> and *Ttp*<sup>-/-</sup> BMDMs. BMDMs were stimulated with LPS (100 ng/ml) alone (-) or with either IgG (10 μg/ml), Enbrel (10 μg/ml), or anti-IL-10 antibody (1 μg/ml). After 6 hours, total RNA was extracted and cytokine mRNA expression was analyzed by qRT-PCR. Each measurement represents the mean and SD ( $n=3$ ). *B*, TTP control of endogenous IL-10 regulates production of IL-6, IL-12, and IL-23. *Ttp*<sup>+/+</sup> and *Ttp*<sup>-/-</sup> BMDMs were incubated with LPS (100 ng/ml) alone (-) or with either IgG (10 μg/ml), Enbrel (10 μg/ml), or anti-IL-10 antibody (1 μg/ml). After 8 hours, supernatants were collected and cytokine concentrations were measured by ELISA. Each measurement represents the mean and SD ( $n=4$ ).
