# Supplementary material
Source: PubMed Central journal article supplement (PMC3424405)
Supplement: NIHMS391902-supplement-2.pdf [file NIHMS391902-supplement-2.pdf]

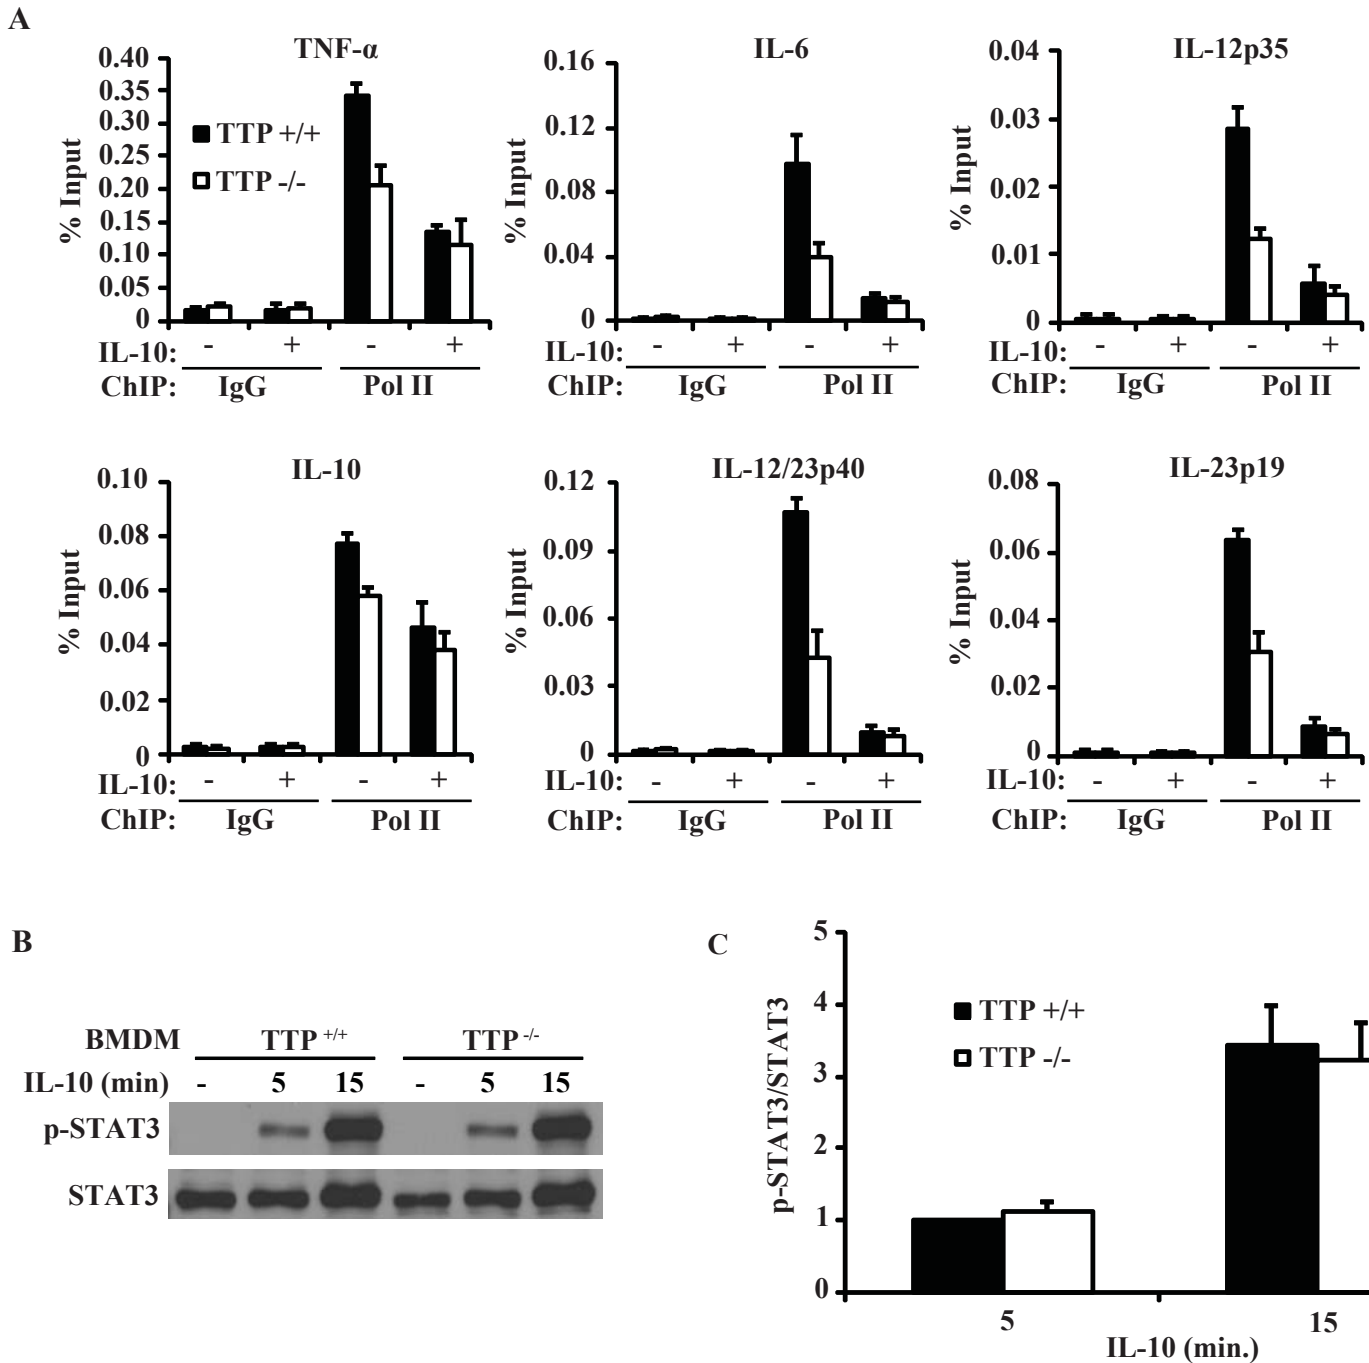

**SUPPLEMENTARY FIGURE 2.** Exogenous IL-10 represses cytokine gene transcription and activates STAT3 independently of TTP. **A**, BMDMs were incubated for 2 hours with LPS in the absence (-) or presence (+) of IL-10 (10 ng/ml) and ChIP was performed with IgG control or anti-RNA Pol II antibody. Each measurement represents the mean and SD ( $n=3$ ). **B**, BMDMs were incubated in the absence (-) or presence of IL-10 (10 ng/ml) for the indicated times and lysates were prepared for immunoblot analysis of STAT3 phosphorylation. **C**, Relative amounts of STAT3 phosphorylation were determined relative to total STAT3. Each measurement represents the mean and SD ( $n=3$ ).
